# Supplementary material for: Iron Porphyrin as a Cytochrome P450 Model for the Degradation of Dye
Source: MDPI journal article supplement (doi:10.3390/molecules27227948), 2022-11-17
Supplement: s1 [file s1]

## Supplementary Materials

### **Iron Porphyrin as a Cytochrome P450 Model for the Degradation of Dye**

Dan-Dan Ren <sup>1,2,†</sup>, Xiaoyan Lu <sup>2,†,\*</sup>, Li-Ping Zhou <sup>2</sup>, Huanghongjun Tian <sup>2</sup>, Shuang Wang <sup>2</sup>, Lu-Fang Ma <sup>1,2,\*</sup>, Dong-Sheng Li <sup>1</sup>

<sup>1</sup> College of Materials and Chemical Engineering, China Three Gorges University, Yichang, 443002, China

<sup>2</sup> Henan Key Laboratory of Function-Oriented Porous Materials, College of Chemistry and Chemical Engineering, Luoyang Normal University, Luoyang, 471934, China

\* Correspondence: zklxiaoyan@163.com (X.L.); mazhuxp@126.com (L.-F.M.)

† These authors contributed equally to this work.

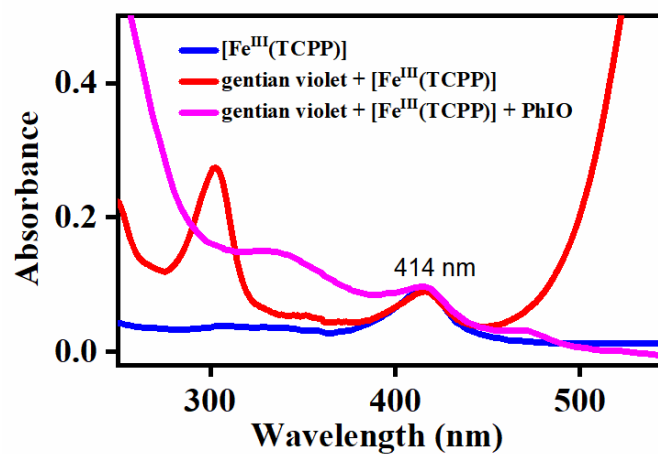

**Figure S1.** UV-visible absorption spectra of  $[\text{Fe}^{\text{III}}(\text{TCPP})]$  (blue line), the mixture of gentian violet and  $[\text{Fe}^{\text{III}}(\text{TCPP})]$  (red line), and the solution after the degradation of crystal violet by the  $[\text{Fe}^{\text{III}}(\text{TCPP})]/\text{PhIO}$  system (pink line).

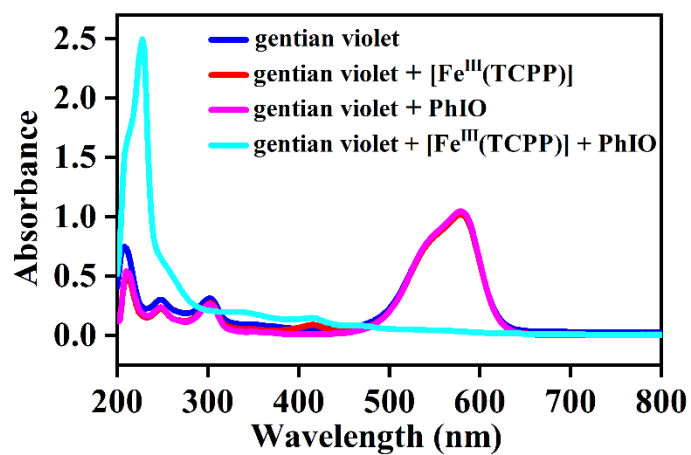

**Figure S2.** UV-visible absorption spectra of gentian violet (0.05 mM, blue line); the mixture of gentian violet (0.05 mM) and [Fe<sup>III</sup>(TCPP)] (red line); the solution of gentian violet (0.05 mM) and PhIO (5 equiv) after stirring 2.5 h (pink line); and the solution of gentian violet (0.05 mM) and PhIO (5 equiv) in the presence of [Fe<sup>III</sup>(TCPP)] after stirring 2.5 h (cyan line).

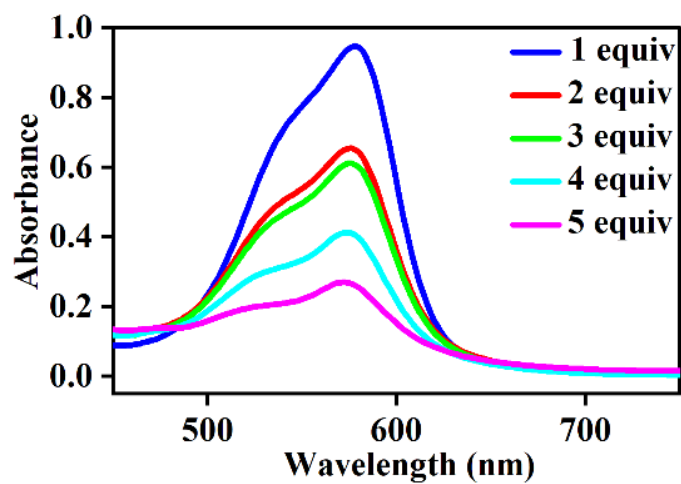

**Figure S3.** UV–vis spectral change observed in the degradation of gentian violet by various concentrations of PhIO. Conditions: gentian violet 0.05 mM;  $[\text{Fe}^{\text{III}}(\text{TCPP})]$  0.005 mM; PhIO 0, 1, 2, 3, 4, 5 equiv; solvent MeOH; 303 K; reaction time 0.5 h.

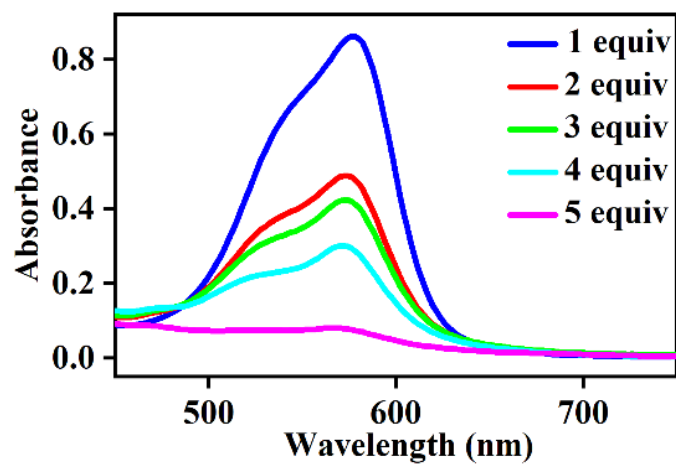

**Figure S4.** UV-vis spectral change observed in the degradation of gentian violet by various concentrations of PhIO. Conditions: gentian violet 0.05 mM;  $[\text{Fe}^{\text{III}}(\text{TCPP})]$  0.005 mM; PhIO 0, 1, 2, 3, 4, 5 equiv; solvent MeOH; 303 K; reaction time 1 h.

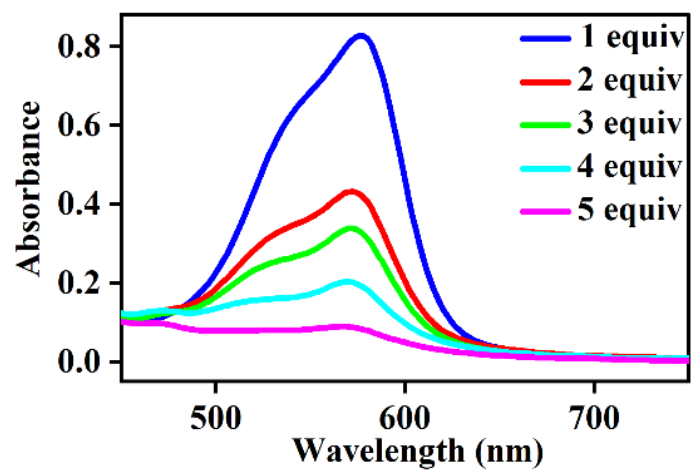

**Figure S5.** UV-vis spectral change observed in the degradation of gentian violet by various concentrations of PhIO. Conditions: gentian violet 0.05 mM;  $[\text{Fe}^{\text{III}}(\text{TCPP})]$  0.005 mM; PhIO 0, 1, 2, 3, 4, 5 equiv; solvent MeOH; 303 K; reaction time 1.5 h.

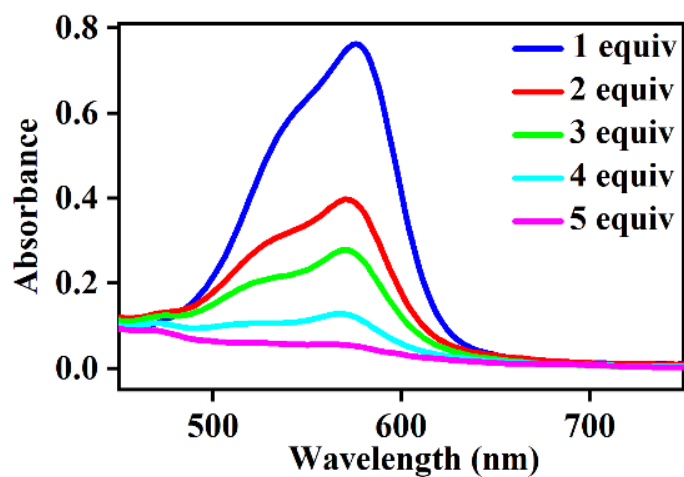

**Figure S6.** UV–vis spectral change observed in the degradation of gentian violet by various concentrations of PhIO. Conditions: gentian violet 0.05 mM;  $[\text{Fe}^{\text{III}}(\text{TCPP})]$  0.005 mM; PhIO 0, 1, 2, 3, 4, 5 equiv; solvent MeOH; 303 K; reaction time 2 h.

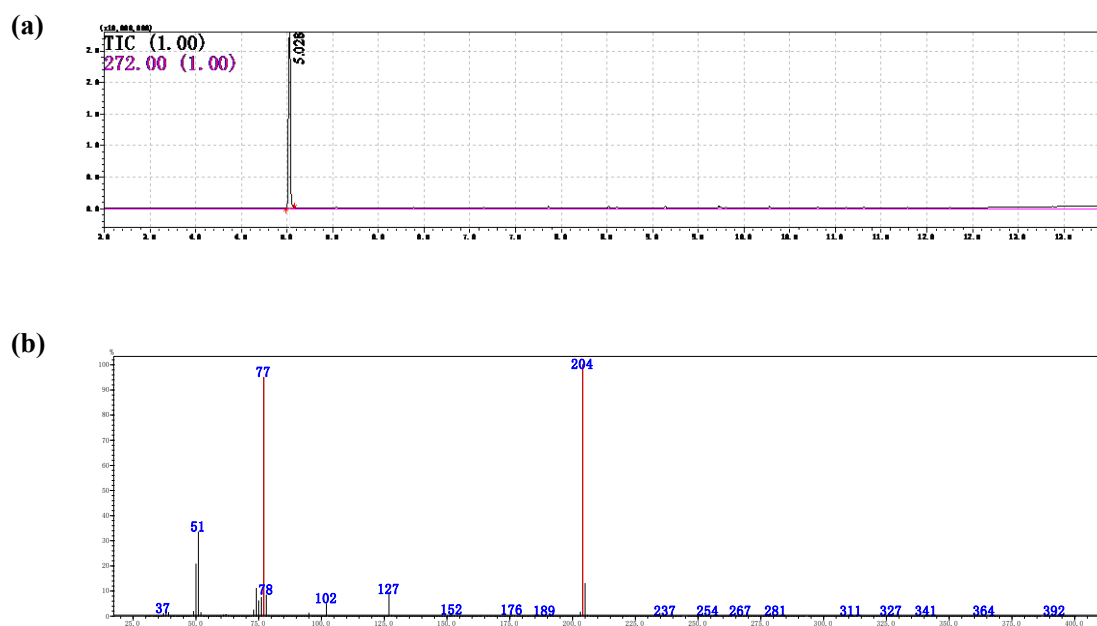

**Figure S7.** GC-MS analysis of the degradation products of crystal violet degraded by the  $[\text{Fe}^{\text{III}}(\text{TCPP})]/\text{PhIO}$  system after color removal. (a) Gas chromatogram; (b) mass spectra for the peak with  $R_T$  value of 5.028 min.
